# Supplementary material for: Development, Management and Utilization of a Kiwifruit (Actinidia spp.) In Vitro Collection: A New Zealand Perspective
Source: Plants (Basel). 2023 May 17;12(10):2009. doi: 10.3390/plants12102009 (PMC10222645; doi:10.3390/plants12102009)
Supplement: Supplementary file 1 [file plants-12-02009-s001.zip › plants-2294962-supplementary.pdf]

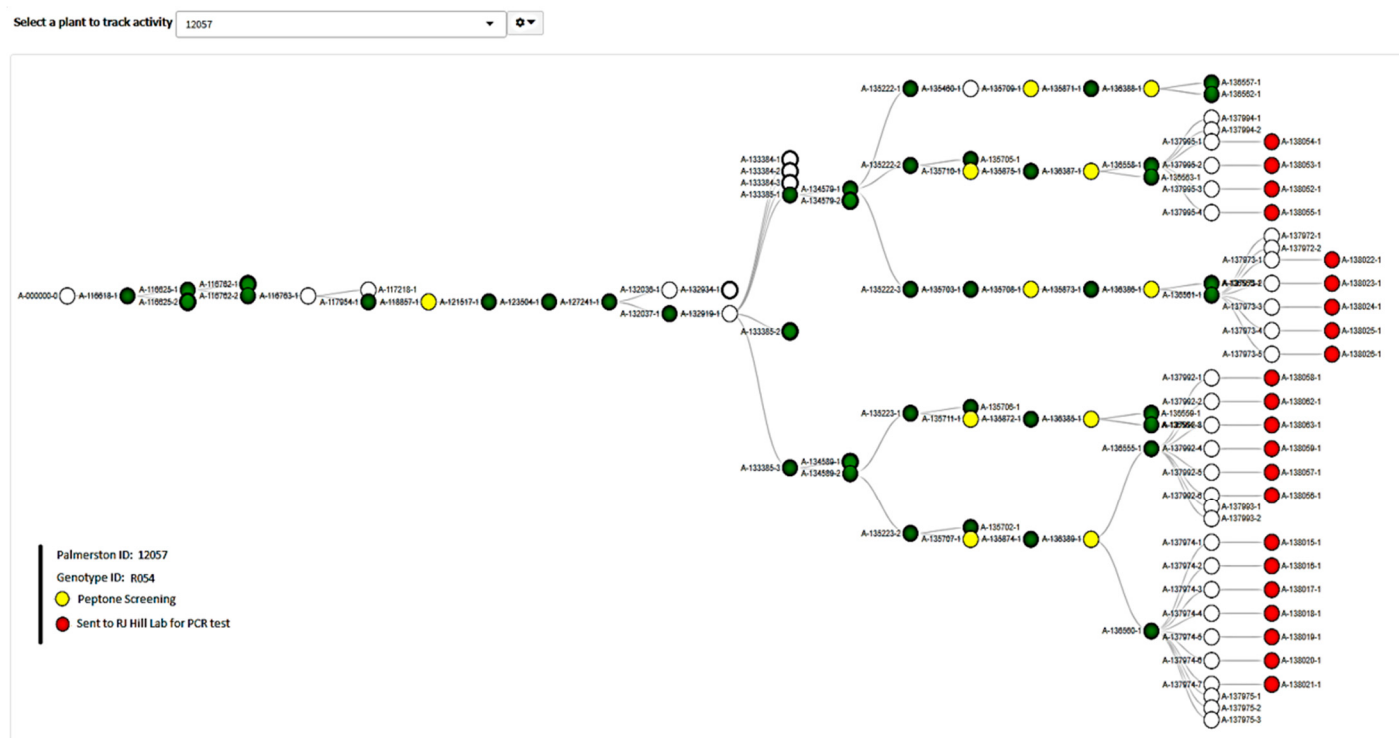

**Figure S1.** Example of activities recorded in GMS for one genotype. The workflow starts at initiation, with subsequent activities until being sent for testing. Each 'Activity Event ID' number (illustrated as a circle) represents one activity.
