# Supplementary figures and images for: Development, Management and Utilization of a Kiwifruit (Actinidia spp.) In Vitro Collection: A New Zealand Perspective
Source: MDPI journal article supplement (doi:10.3390/plants12102009), 2023-05-17

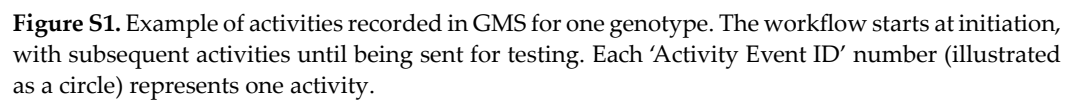

Supplement: s1 [file s1]
